# Supplementary material
Source: PubMed Central journal article supplement (PMC7335238)

Lineage I

Lineage II

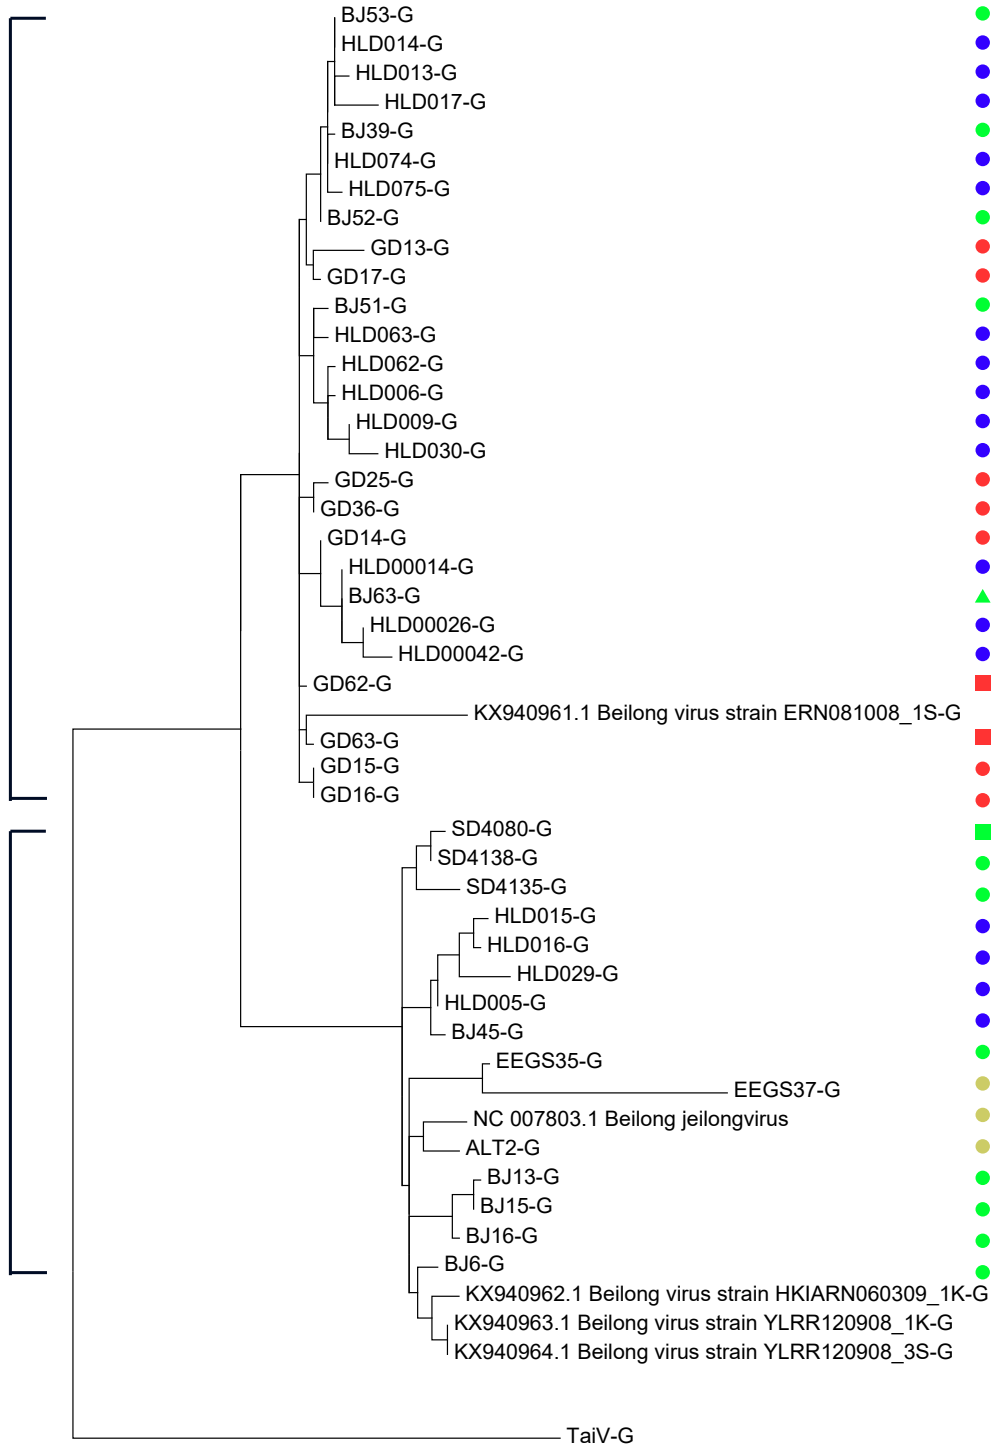

0.0100

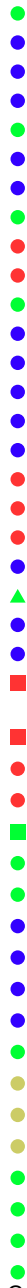

Supplement: mmc1.pdf [file mmc1.pdf]
